# Supplementary material for: Synthesis, structure analysis and catalytic activity of two Ln-coordination polymers containing benzophenone-4,4′-dicarboxylate linker
Source: Royal Society of Chemistry journal article supplement (doi:10.1039/d2nj04116b), 2022-12-17
Supplement: d2nj04116b1.pdf [file d2nj04116b1.pdf]

# **Synthesis, structure analysis and catalytic activity of two Ln-coordination polymers containing benzophenone-4,4'- dicarboxylate linker**

*Taraneh Hajiashrafi,<sup>a\*</sup> Mohaddeseh Sheikholeslami,<sup>a</sup> Maryam Ahmadi Arjanaki,<sup>a</sup>  
Sara Tarighi,<sup>b</sup> Zhifang Guo,<sup>c</sup> and Peter C. Junk<sup>c</sup>*

<sup>a</sup> *Department of Inorganic Chemistry, Faculty of Chemistry, Alzahra University, Tehran, Iran*

<sup>b</sup> *Faculty of Petrochemicals, Iran Polymer and Petrochemical Institute, P.O. Box 14975-112,  
Tehran, Iran*

<sup>c</sup> *College of Science Technology and Engineering, James Cook University, Townsville Qld,  
4811, Australia*

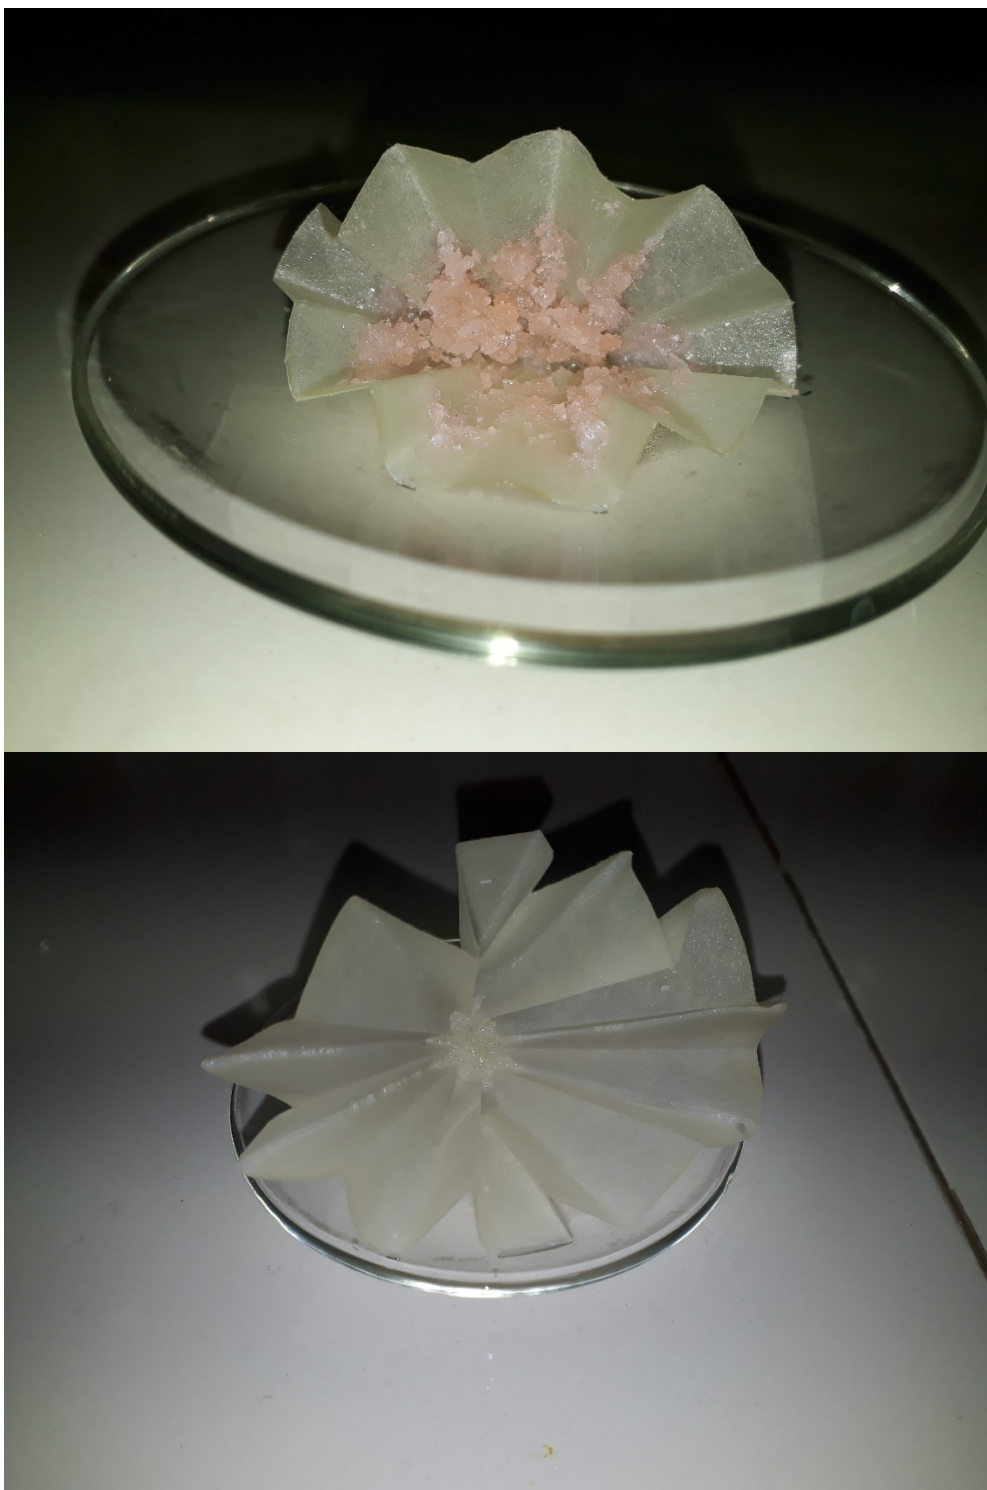

**Figure S1.** As-synthesized crystals of  $[\text{Er}_2(\text{bpndc})_3(\text{DMF})_2]$  (top) and  $[\text{Yb}_2(\text{bpndc})_3(\text{DMF})_2]$  (bottom)

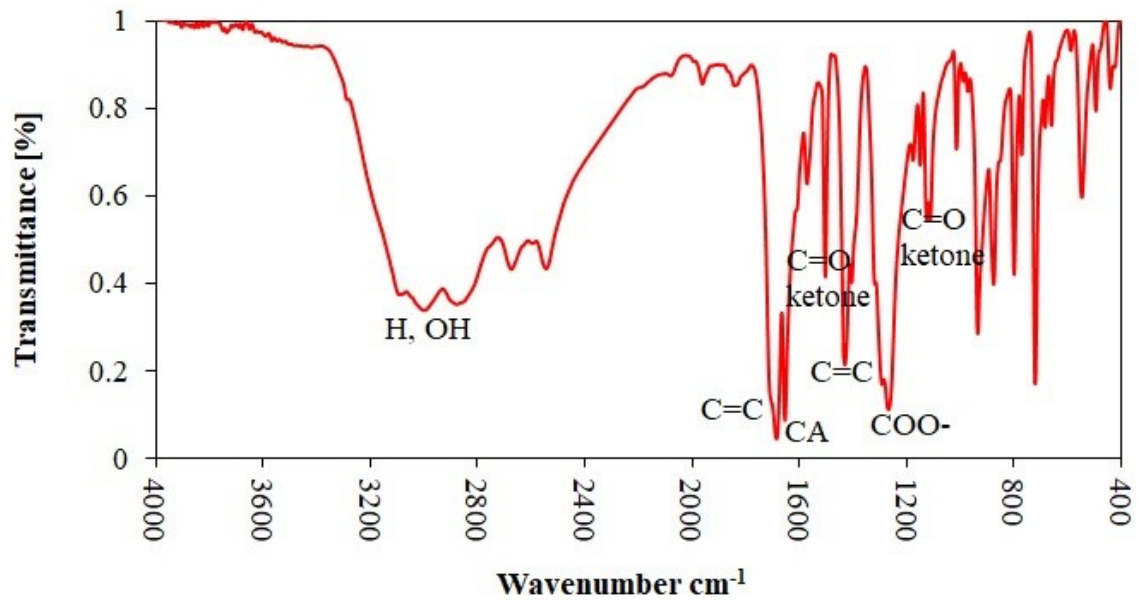

(a)

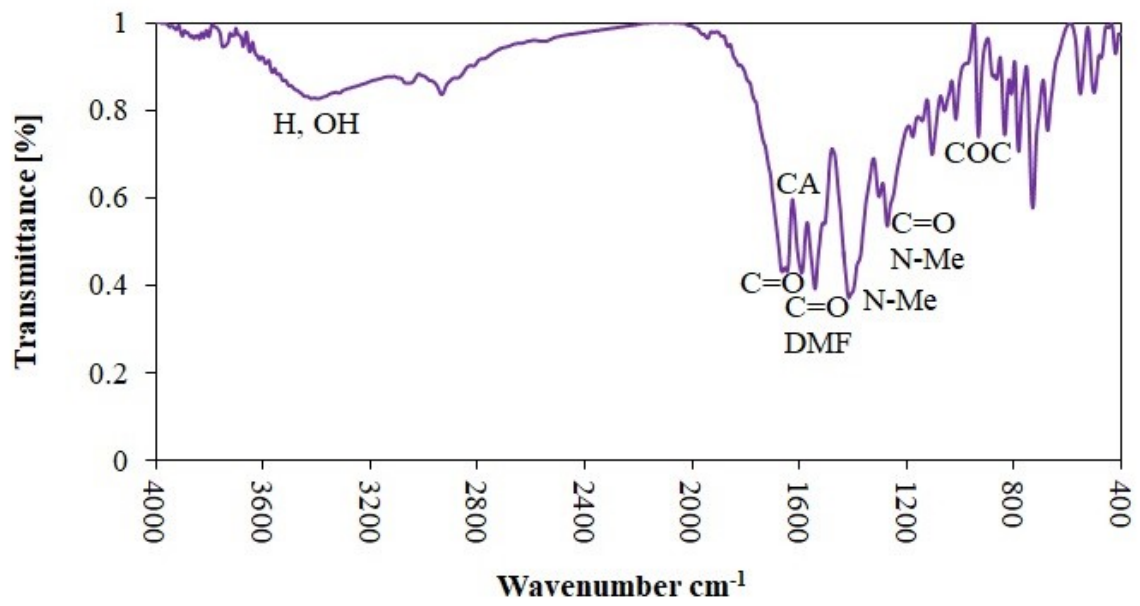

(b)

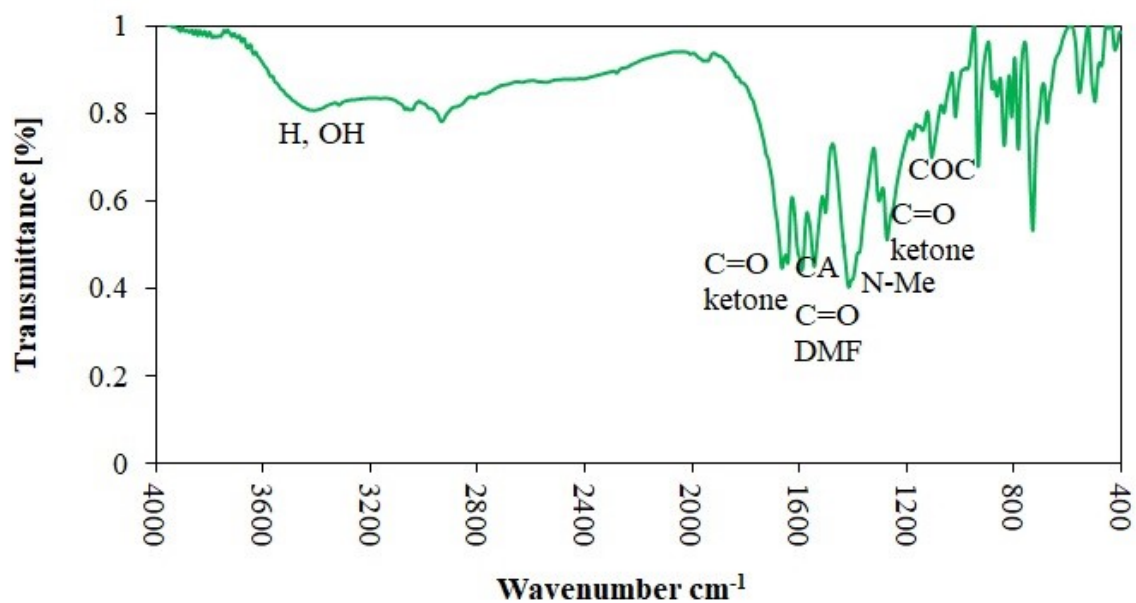

(c)

**Figure S2.** FT-IR spectra of Benzophenone-4,4'-dicarboxylic acid (a)  $[\text{Er}_2(\text{bpndc})_3(\text{DMF})_2]$  (b) and  $[\text{Yb}_2(\text{bpndc})_3(\text{DMF})_2]$  (c)

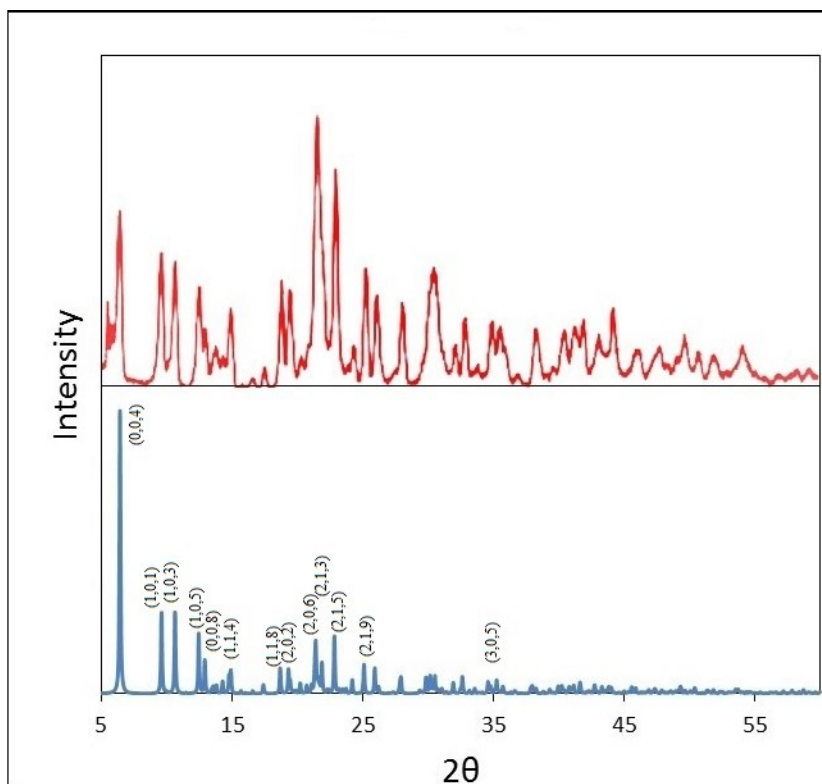

(a)

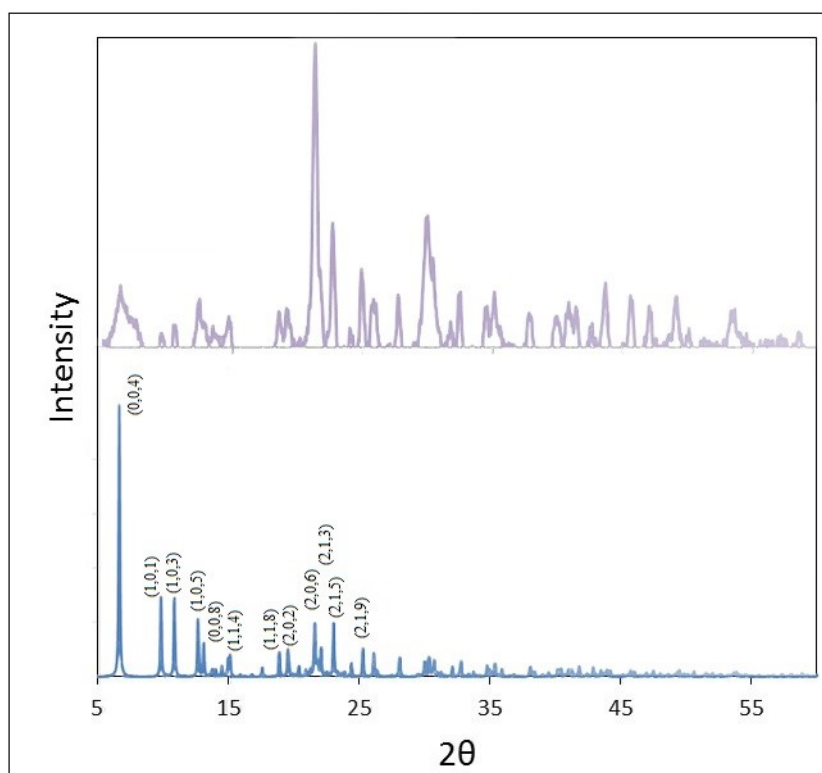

(b)

**Figure S3.** Powder X-ray Diffraction of  $[\text{Er}_2(\text{bpndc})_3(\text{DMF})_2]$  (a) and  $[\text{Yb}_2(\text{bpndc})_3(\text{DMF})_2]$  (b) simulated (bottom), as synthesized (top) by solvothermal method.

| Hkl     | Multiplicity | dhkl        | Distance    | Total facet area | % Total facet area |
|---------|--------------|-------------|-------------|------------------|--------------------|
| {0 0 4} | 2            | 13.66625000 | 7.31729626  | 722.69832423     | 36.74104347        |
| {1 0 1} | 8            | 9.17066195  | 10.90433827 | 934.37697279     | 47.50251083        |
| {1 0 2} | 8            | 8.80642509  | 11.35534555 | 303.48731526     | 15.42890065        |

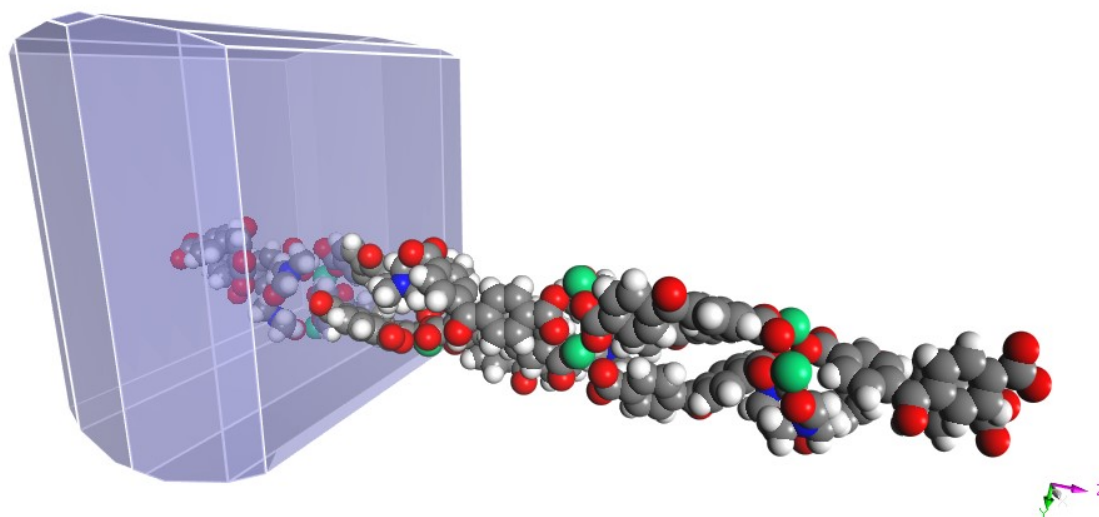

**Figure S4.** Face lists generated according to the BFDH and The predicted morphology of corresponding compounds **1** and **2**

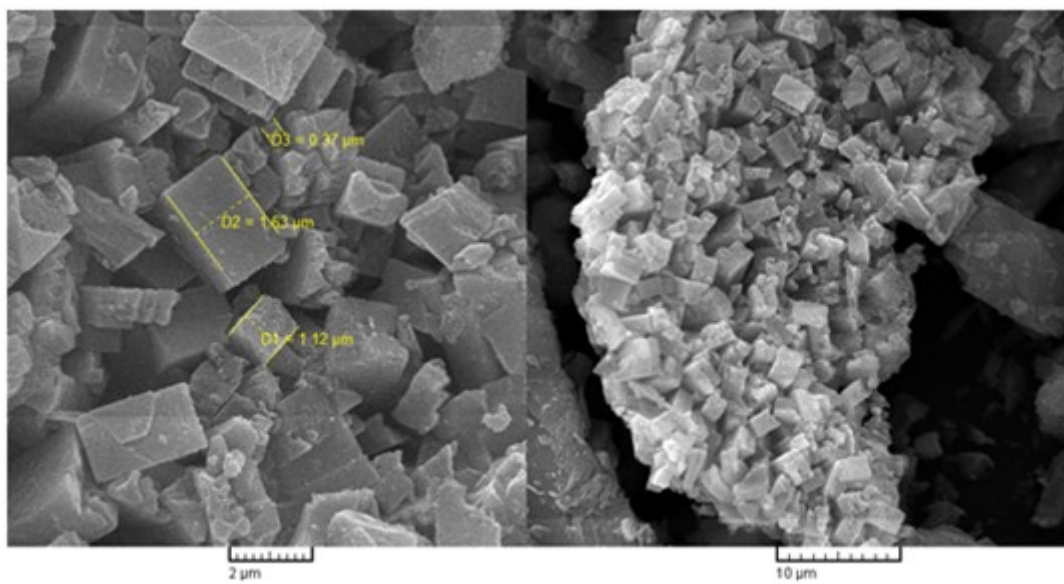

(a)

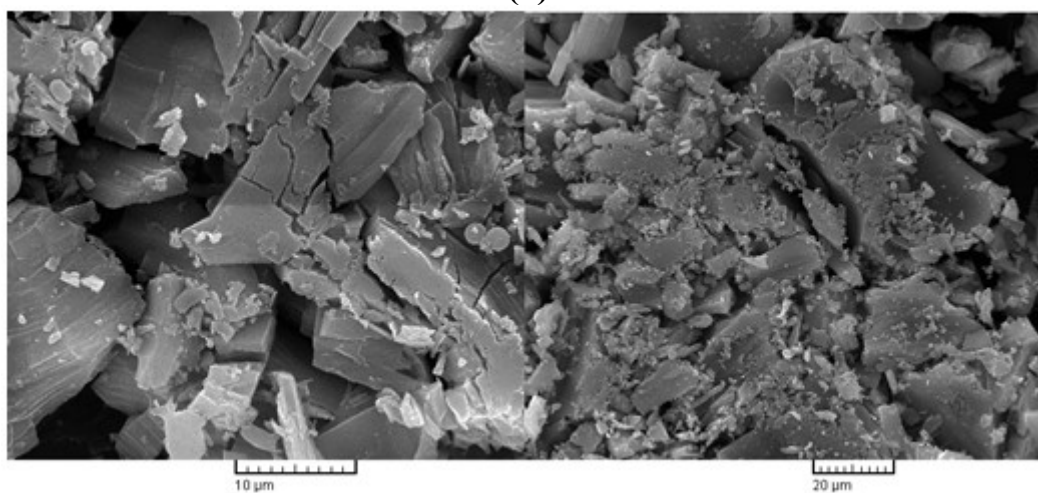

(b)

**Figure S5.** FE-SEM images of  $[\text{Er}_2(\text{bpndc})_3(\text{DMF})_2]$  (a) and  $[\text{Yb}_2(\text{bpndc})_3(\text{DMF})_2]$  (b) at two different magnifications with different locations



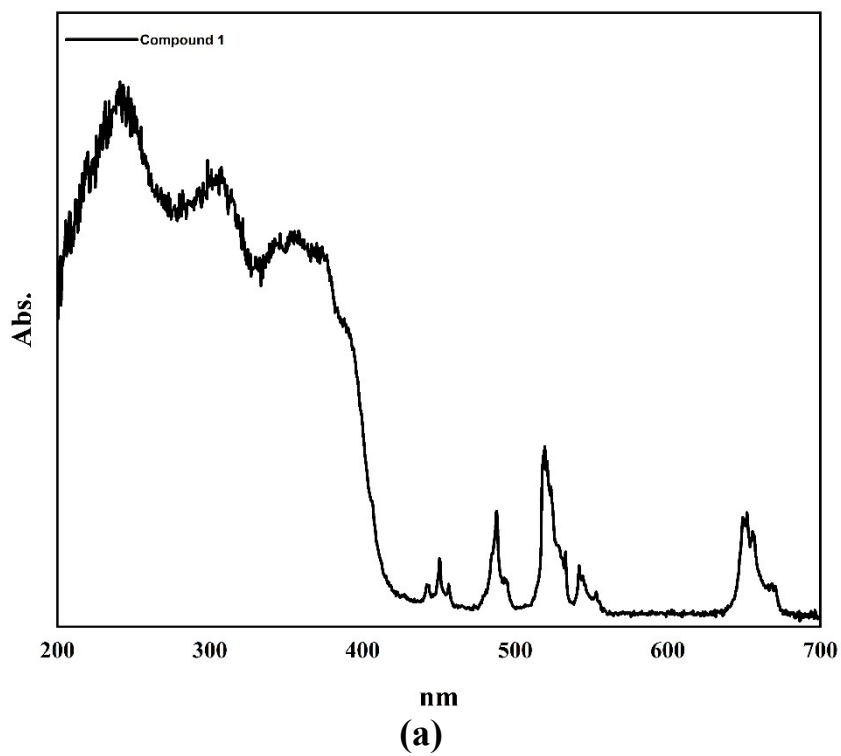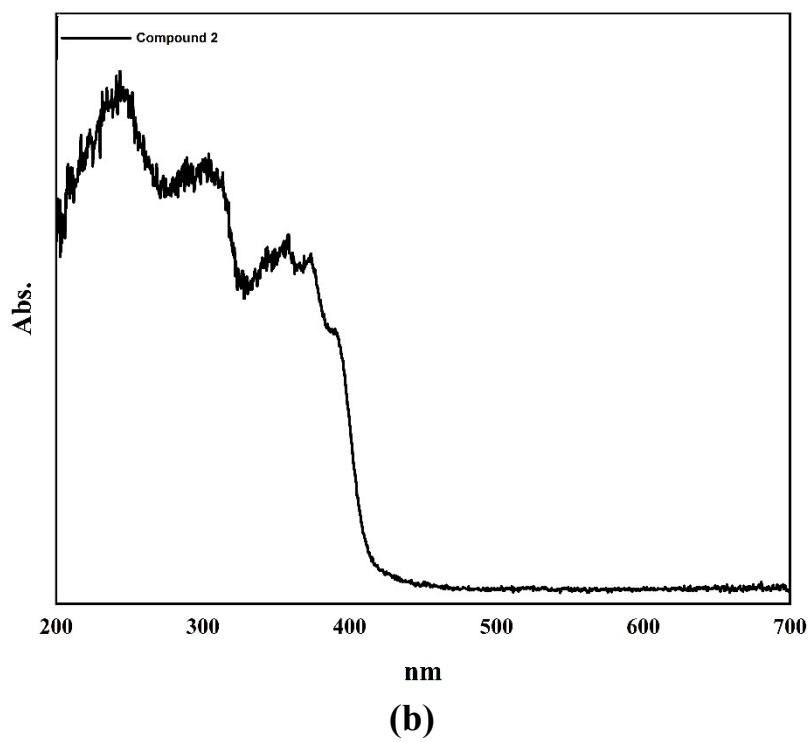

**Figure S6.** excitation wavelength of compounds **1** (a) and **2** (b) in the solid state at room temperature.



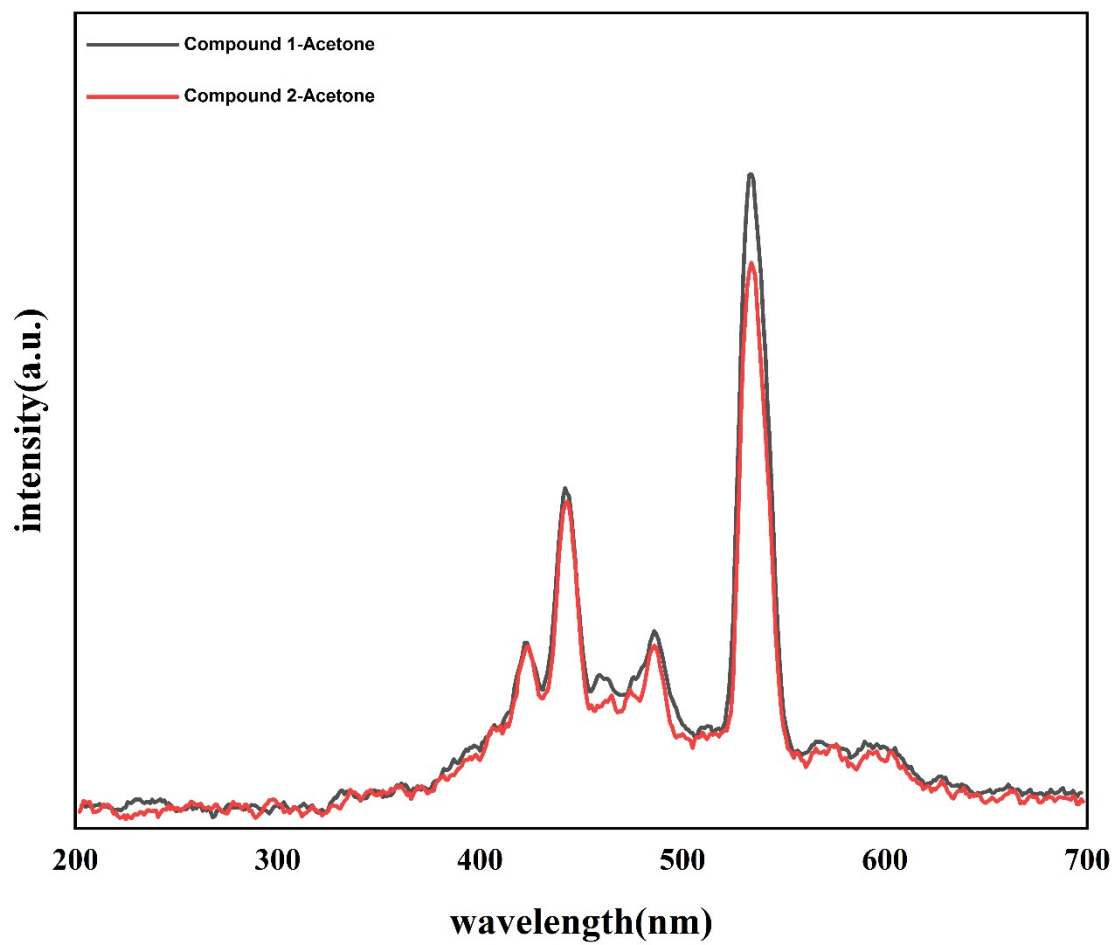

**Figure S7.** The emission spectrum of 4 mg compounds **1** and **2** dispersed in 5 ml of acetone at room temperature

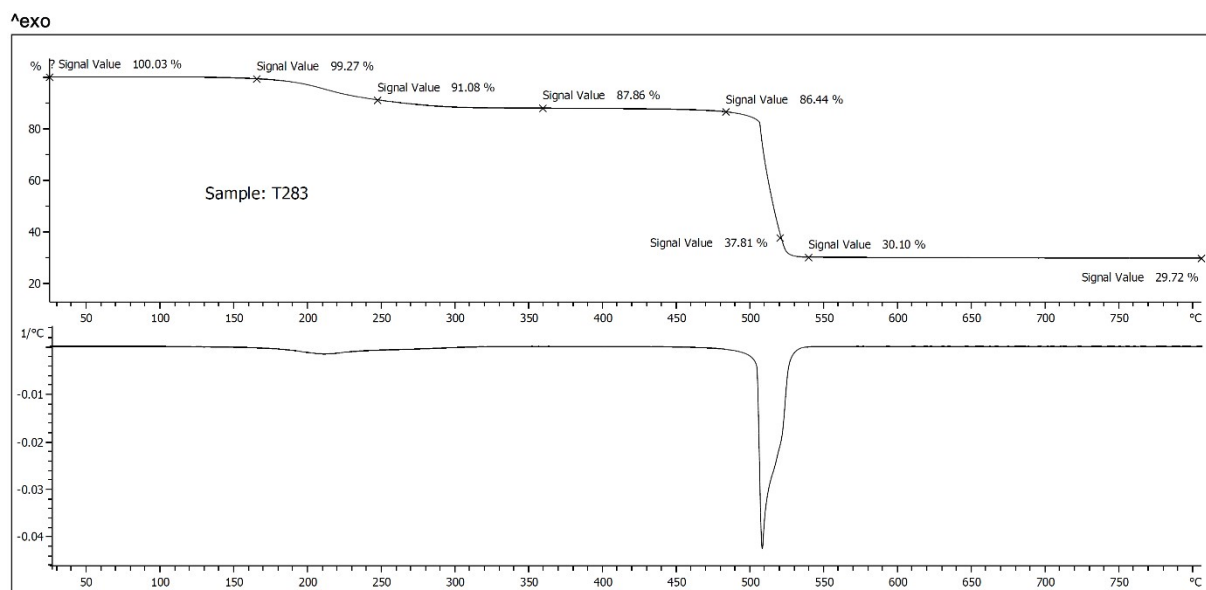

(a)

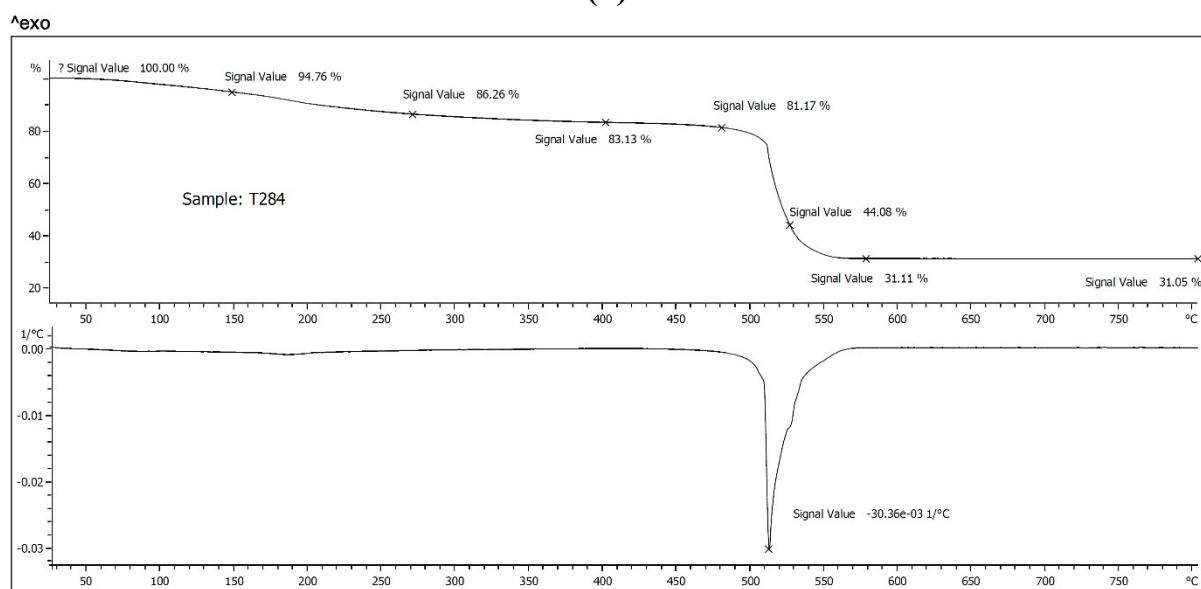

(b)

**Figure S8.** Thermogravimetric analyses of  $[\text{Er}_2(\text{bpndc})_3(\text{DMF})_2]$  (a) and  $[\text{Yb}_2(\text{bpndc})_3(\text{DMF})_2]$  (b)

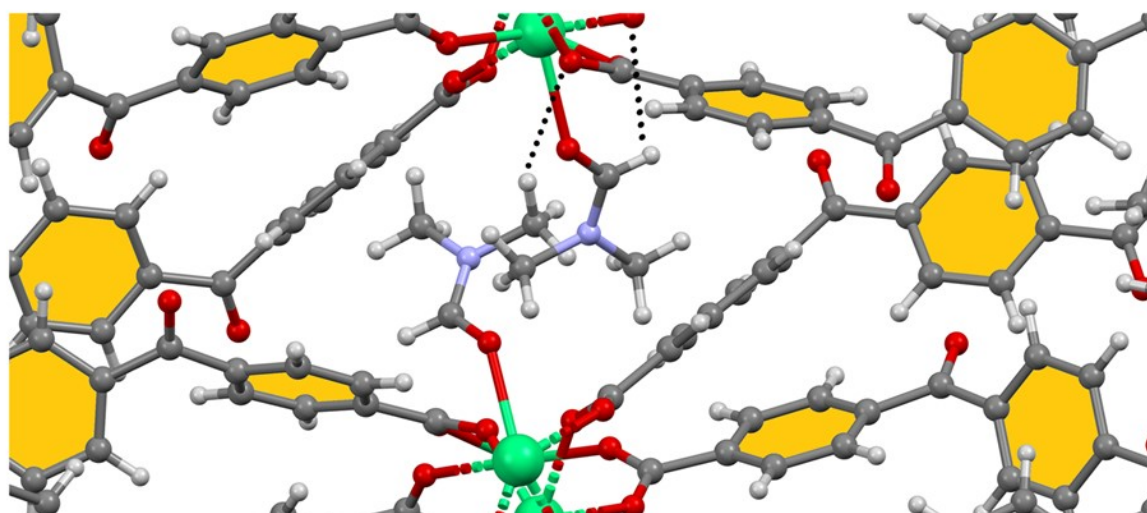

(a)

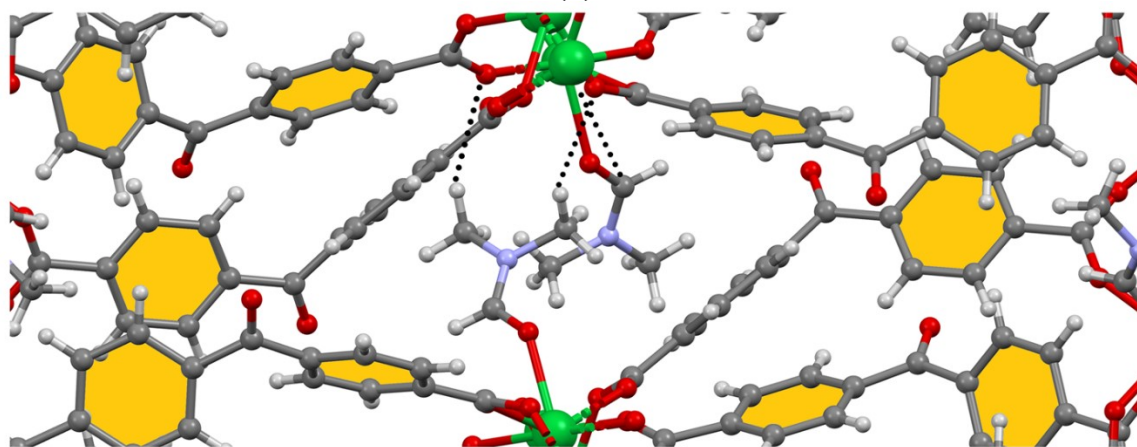

(b)

**Figure S9.** Hydrogen bonding interactions between the coordinated DMF solvent molecules and the carboxylate oxygen atoms in the crystal structure of compounds **1** and **2**

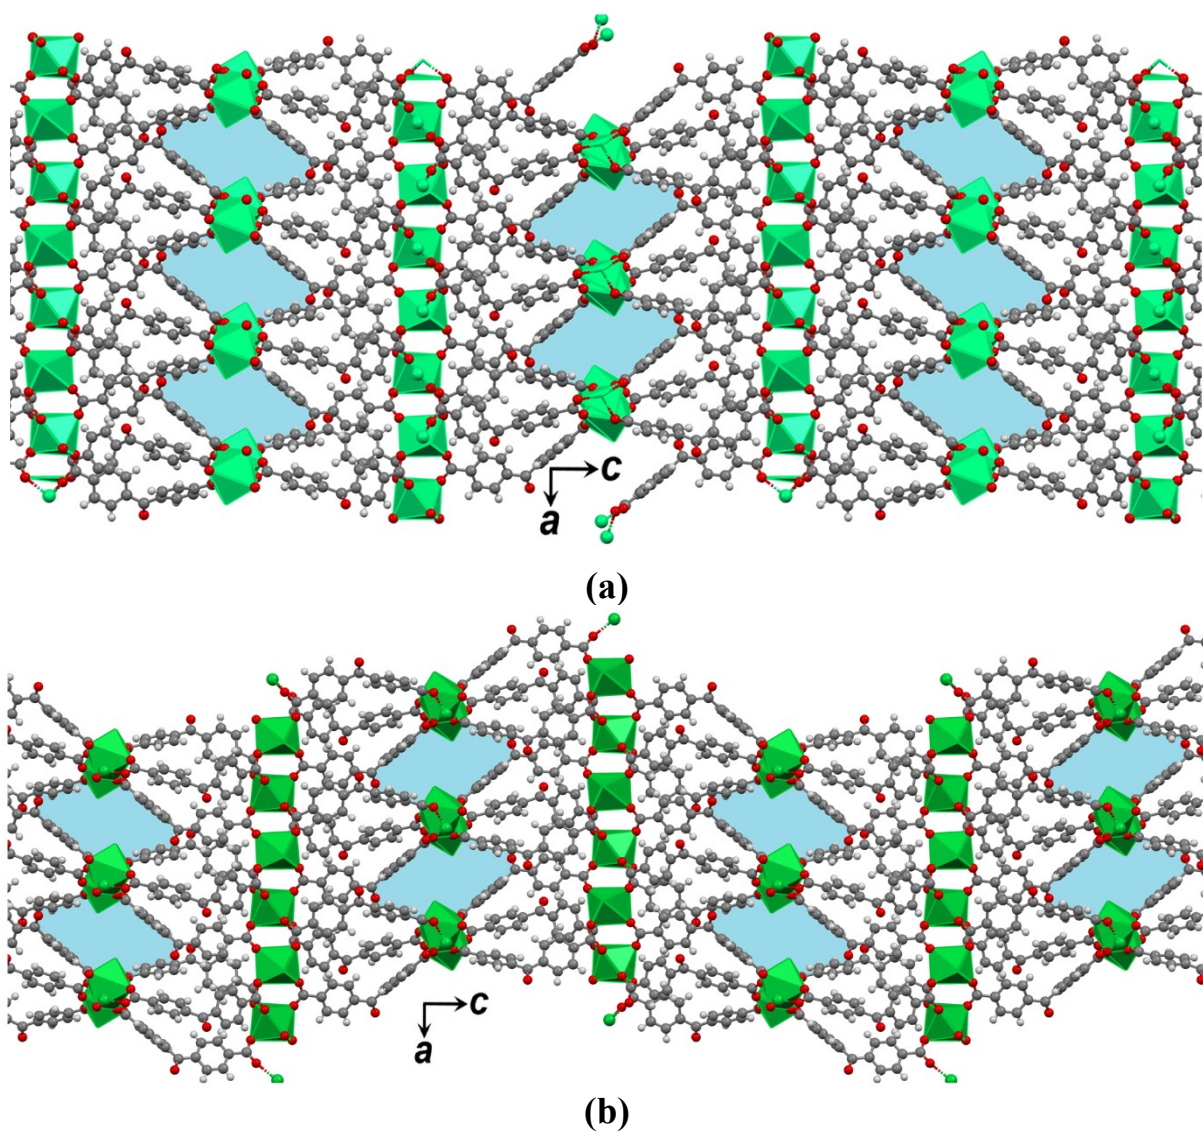

**Figure S10.** The 3D coordination polymer chains of **1** and **2** pack closely to build a dense crystal structure without any free solvent molecules between them and contain no void spaces. These frameworks would have unsaturated lanthanide centers and possess narrow pore channels running along the *a*- and *b*-axis without coordinated DMF molecules.

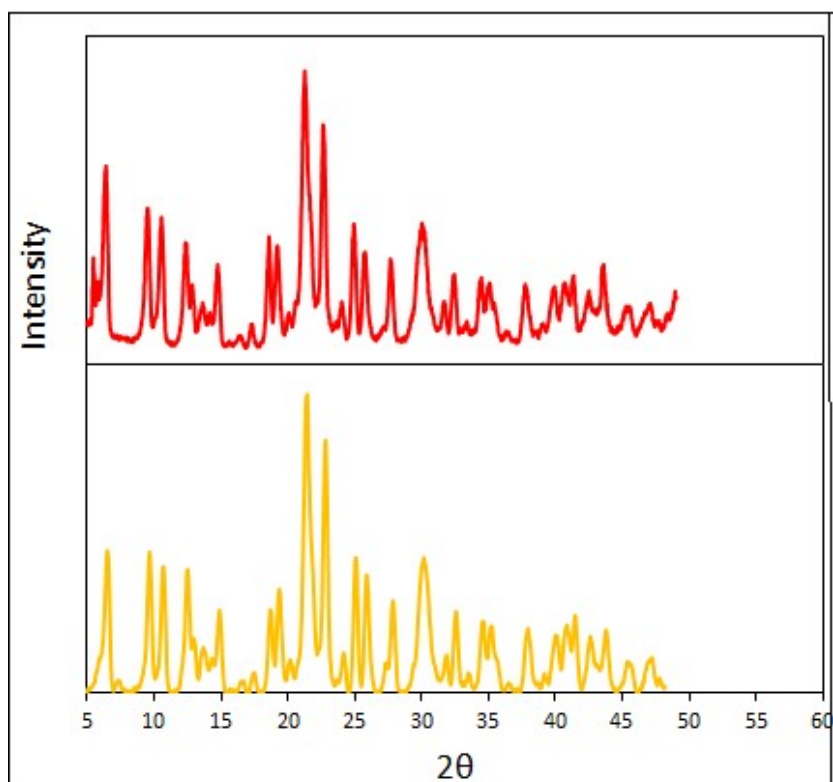

(a)

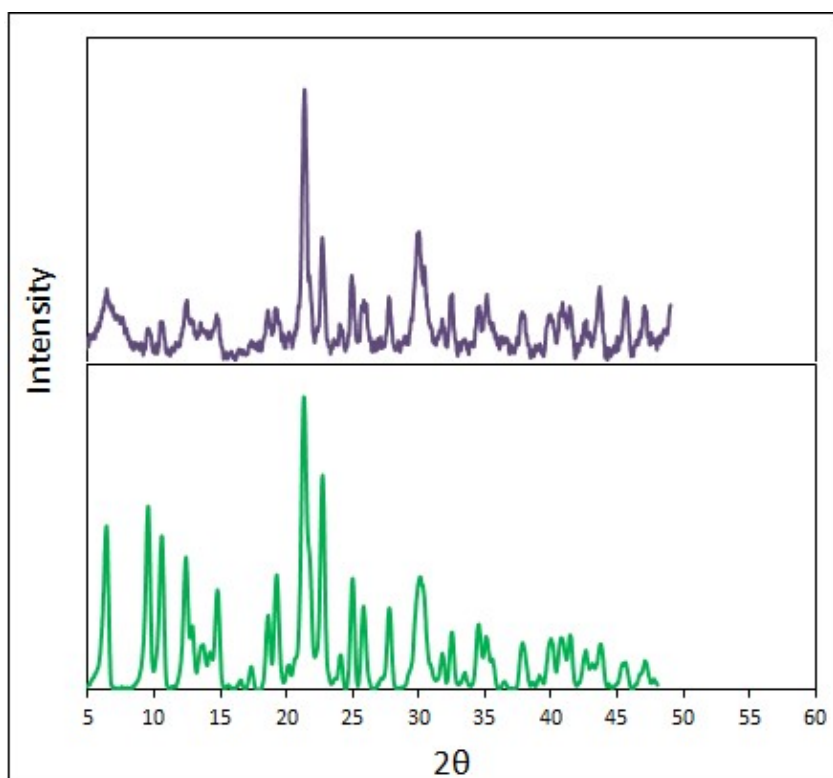

(b)

**Figure S11.** Powder X-ray Diffraction of  $[\text{Er}_2(\text{bpndc})_3(\text{DMF})_2]$  (a) and  $[\text{Yb}_2(\text{bpndc})_3(\text{DMF})_2]$  (b) as-synthesized (top), and after being dispersed in acetone for 10 h (bottom)



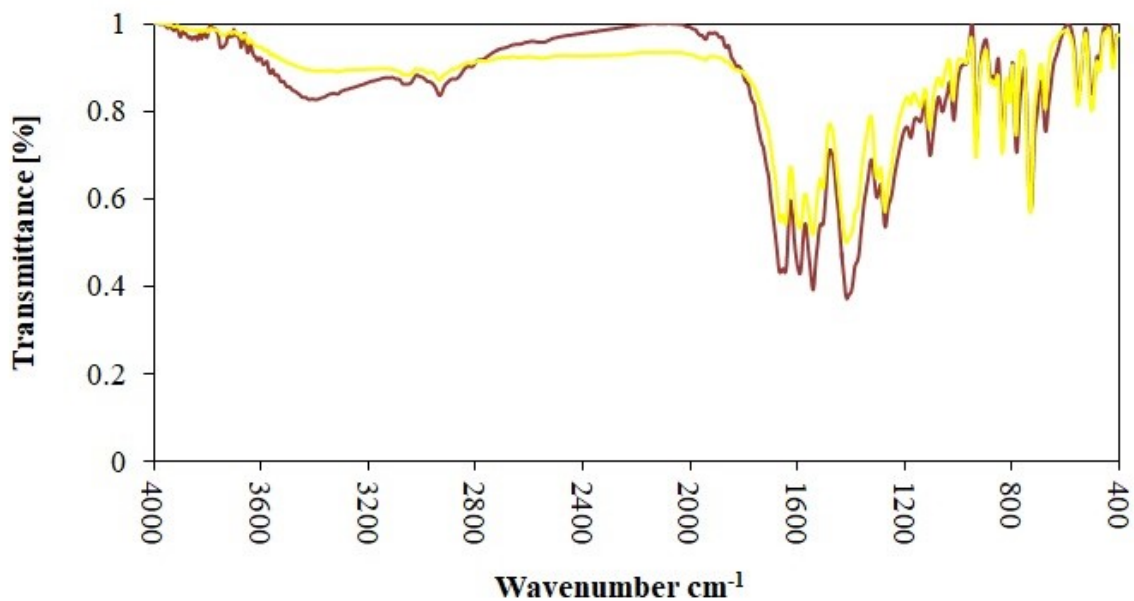

(a)

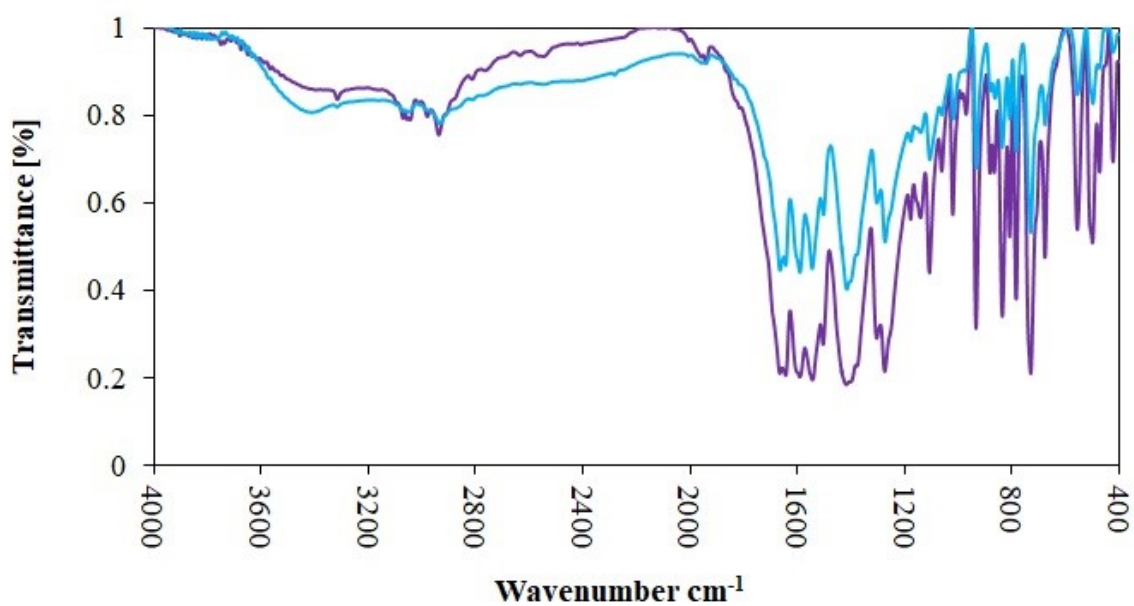

(b)

**Figure S12.** FT-IR spectra of  $[\text{Er}_2(\text{bpndc})_3(\text{DMF})_2]$  (brown:as-synthesized; yellow: after being dispersed in acetone for 10 h) (a) and  $[\text{Yb}_2(\text{bpndc})_3(\text{DMF})_2]$  (purple:as-synthesized; blue: after being dispersed in acetone for 10 h) (b)

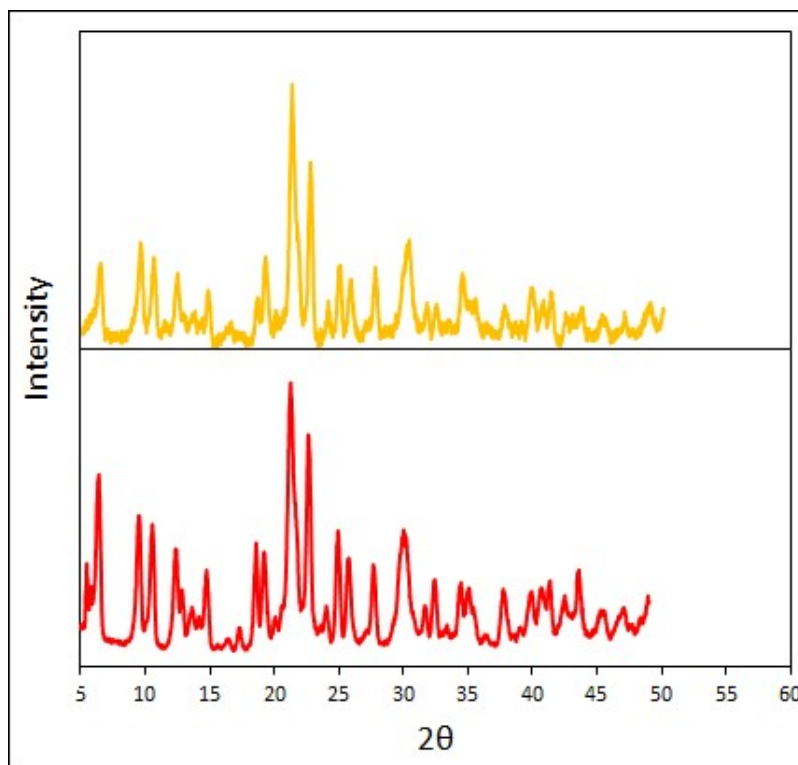

(a)

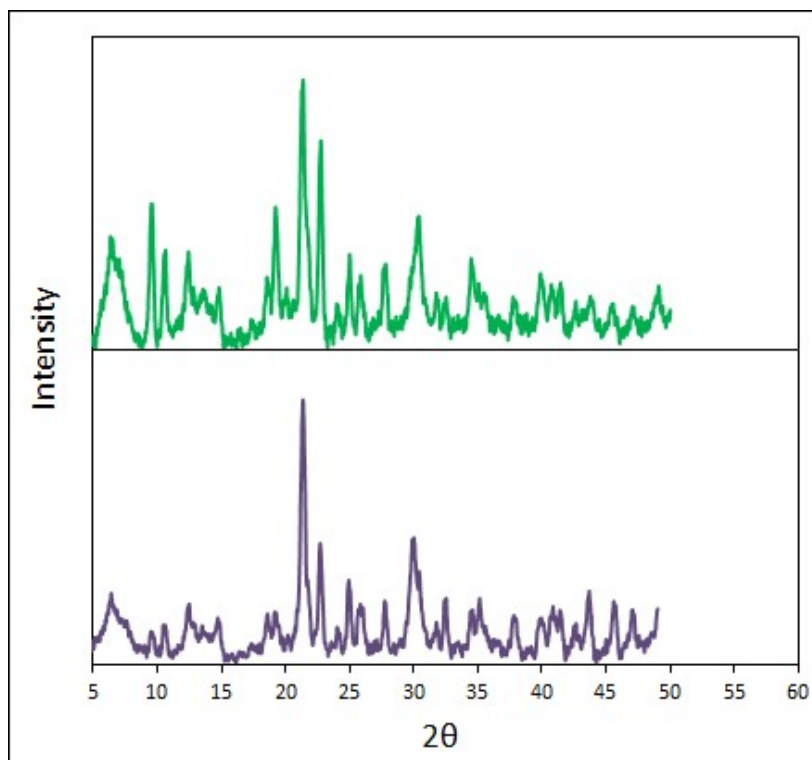

(b)

**Figure S13.** Powder X-ray Diffraction of  $[\text{Er}_2(\text{bpndc})_3(\text{DMF})_2]$  (a) and  $[\text{Yb}_2(\text{bpndc})_3(\text{DMF})_2]$  (b) as-synthesized (top), and after the catalytic activity in the acetalization of glycerol (bottom)
